# Supplementary material for: A Green Laboratory Approach to Medical Sample Transportation: Assessing the Carbon Dioxide (CO2) Footprint of Medical Sample Transportation by Drone, Combustion Car, and Electric Car
Source: Preprints.org preprint supplement (doi:10.20944/preprints202408.0908.v1), 2024-08-13
Supplement: Supplementary file 1 [file supplementary]

## Sheet: CO2 emission
Drive	Conventional Car (g/km CO2)	Electric Car (g/km, CO2)	Drone (g/km, CO2)		2640g/L CO2 emission from Diesel
1	191.4	2.92	0.0873
2	160.1	3.69	0.0889		29.8g/kWh CO2 emisson electricity from suisse energymix
3	158.7	3.21	0.0876
4	170.9	3.72	0.0888		15.7g/kWh CO2 electricity from suisse renewable energy sources
5	132.8	3.24	0.0906
6	146.1	3.72	0.0893		6.04 L/100km Diesel consumption over the whole fleet of Dr Risch Diesel Cars. (Number cars / energy consumption average)
7	168.7	3.29	0.0877
8	167.4	2.92	0.0903
9	180.1	3.11	0.0908
10	135.8	3.48	0.087
11	156.9	3.92	0.0891
12	153.9	3.69	0.0876
13	141.4	3.48	0.0902
14	147.5	3.28	0.0896
15	157.4	3.69	0.0897
16	151.7	3.15	0.0893
17	189.2	3.91	0.0872
18	175.8	3.08	0.0882
19	191.4	3.86	0.0903
20	158.3	3.29	0.0882
21	138.1	3.49	0.0885
22	163.4	3.29	0.0874
23	150.9	3.14	0.0894
24	140.3	3.64	0.0894
Mean	159.508	3.42542	0.08885
Standartabweichung	17.2346	0.305884	0.00116694

## Sheet: Time for Distance City and Flat
Car heavy traffic	Car heavy traffic	Car normal traffic	Car normal traffic	Drone	Drone
Time travelled (min)	Distance covered (km)	Time travelled (min)	Distance covered (km)	Time travelled (min)	Distance covered (km)				Drone compared to car in heavy traffic	Drone compared to car in normal traffic	Drone compared to car in mountainous terrain
14	6.8	7	6.8	3	4.1	Route 1	Buchs - Vaduz		78.5714	57.1429	78.5714
35	7.7	18	7.7	7	7.37	Route 2	Zürich Tiefenbrunnen - Zürich Oerlikon		80	61.1111	40
37	15.1	23	15.1	11	13.1	Route 3	Meilen - Zürich		70.2703	52.1739	71.4286
38	16.6	24	16.6	13	14.9	Route 4	Meilen - Rapperswil		65.7895	45.8333	56
32	23.4	22	23.4	14	17.2	Route 5	Chur - Grüsch		56.25	36.3636	60
37	23.2	19	23.2	15	17.5	Route 6	Buchs - Mels		59.4595	21.0526	58.1395
42	33.1	31	33.1	23	25.45	Route 7	Glarus - Walenstadt		45.2381	25.8065	45.7143
52	41.8	37	41.8	32	37.2	Route 8	Buchs - Chur		38.4615	13.5135	13.0435
68	60	41	60	35	52	Route 9	Buchs - Stephanshorn		48.5294	14.6341	26.1905
			25.3		20.98		Mean		60.2855	36.4035	49.8986

## Sheet: Time for Distance Mountain
Car in mountainous terrain	Car in mountainous terrain	Drone	Drone
Time travelled (min)	Distance covered (km)	Time travelled (min)	Distance covered (km)				Drone compared to car in mountainous terrain
28	15.6	6	5.7	Route 1	Buchs - Gaflei		78.5714
10	6.4	6	6	Route 2	Meilen - Oetwil am See		40
28	13	8	8.4	Route 3	Lugano - Bidogno		71.4286
25	16	11	12	Route 4	Buchs - Wildhaus		56
30	21.5	12	13.5	Route 5	Buchs - Malbun		60
43	28.9	18	20	Route 6	Chur - Arosa		58.1395
35	26.8	19	22.5	Route 7	Saas-Fee - Visp		45.7143
23	25.8	20	23.9	Route 8	Albula - Bonaduz		13.0435
42	44	31	38.5	Route 9	Davos - Landquart		26.1905
	22		16.7222				49.8986

## Sheet: Efficiency
Route 1	Buchs - Stephanshorn										Pro Probe CO2
Zeit Drone	Probenanzahl Drone	Zeit Auto	Probenanzahl Auto	CO2 Drone	CO2 Auto	CO2 E Car		km Drone	km Auto		Drone	Auto	E Car
35	40	68	500	4.68	9570	205.8		52	60		0.117	19.14	0.4116
105	80	204	1000	14.04	28710	617.4		156	180		0.1755	28.71	0.6174
175	120	340	1500	23.4	47850	1029		260	300		0.195	31.9	0.686
245	160	476	2000	32.76	66990	1440.6		364	420		0.20475	33.495	0.7203
315	200	612	2500	42.12	86130	1852.2		468	540		0.2106	34.452	0.74088
385	240	748	3000	51.48	105270	2263.8		572	660		0.2145	35.09	0.7546
455	280	884	3500	60.84	124410	2675.4		676	780		0.217286	35.5457	0.7644
Route 2	Zürich Tiefenbrunnen - Zürich Oerlikon										Pro Probe CO2
Zeit Drone	Probenanzahl Drone	Zeit Auto	Probenanzahl Auto	CO2 Drone	CO2 Auto	CO2 E Car		km Drone	km Auto		Drone	Auto	E Car
12	40	35	500	0.666	1228.15	26.411		7.4	7.7		0.01665	2.4563	0.052822
36	80	105	1000	1.998	3684.45	79.233		22.2	23.1		0.024975	3.68445	0.079233
60	120	175	1500	3.33	6140.75	132.055		37	38.5		0.02775	4.09383	0.0880367
84	160	245	2000	4.662	8597.05	184.877		51.8	53.9		0.0291375	4.29852	0.0924385
108	200	315	2500	5.994	11053.4	237.699		66.6	69.3		0.02997	4.42134	0.0950796
132	240	385	3000	7.326	13509.6	290.521		81.4	84.7		0.030525	4.50322	0.0968403
156	280	455	3500	8.658	15965.9	343.343		96.2	100.1		0.0309214	4.5617	0.098098
180	320	525	4000	9.99	18422.2	396.165		111	115.5		0.0312187	4.60556	0.0990413
204	360	595	4500	11.322	20878.5	448.987		125.8	130.9		0.03145	4.63968	0.0997749
228	400	665	5000	12.654	23334.9	501.809		140.6	146.3		0.031635	4.66697	0.100362
252	440	735	5500	13.986	25791.1	554.631		155.4	161.7		0.0317864	4.6893	0.100842
276	480	805	6000	15.318	28247.5	607.453		170.2	177.1		0.0319125	4.70791	0.101242
300	520	875	6500	16.65	30703.8	660.275		185	192.5		0.0320192	4.72365	0.101581
Route 3	Chur - Arosa										Pro Probe CO2
Zeit Drone	Probenanzahl Drone	Zeit Auto	Probenanzahl Auto	CO2 Drone	CO2 Auto	CO2 E Car		km Drone	km Auto		Drone	Auto	E Car
18	40	48	500	1.8	4131.05	88.837		20	25.9		0.045	8.2621	0.177674
54	80	144	1000	5.4	12393.1	266.511		60	77.7		0.0675	12.3932	0.266511
90	120	240	1500	9	20655.2	444.185		100	129.5		0.075	13.7702	0.296123
126	160	336	2000	12.6	28917.4	621.859		140	181.3		0.07875	14.4587	0.31093
162	200	432	2500	16.2	37179.4	799.533		180	233.1		0.081	14.8718	0.319813
198	240	528	3000	19.8	45441.5	977.207		220	284.9		0.0825	15.1472	0.325736
234	280	624	3500	23.4	53703.7	1154.88		260	336.7		0.0835714	15.3439	0.329966
270	320	720	4000	27	61965.8	1332.56		300	388.5		0.084375	15.4914	0.333139
306	360	816	4500	30.6	70227.9	1510.23		340	440.3		0.085	15.6062	0.335606
342	400	912	5000	34.2	78489.9	1687.9		380	492.1		0.0855	15.698	0.337581
378	440	1008	5500	37.8	86752.1	1865.58		420	543.9		0.0859091	15.7731	0.339196
